# Supplementary material for: The landscape of multiscale transcriptomic networks and key regulators in Parkinson’s disease
Source: PubMed Central journal article supplement (PMC6868244; doi:10.1038/s41467-019-13144-y), 2019-11-20
Supplement: 41467_2019_13144_MOESM1_ESM.pdf [file 41467_2019_13144_MOESM1_ESM.pdf]

1  
2  
3  
4

**The Landscape of Multiscale Transcriptomic Networks and  
Key Regulators in Parkinson's Disease**

*Wang et al.*

## 5 **Supplementary Note 1**

6 We evaluated the conservation between the MEGENA modules and those from the traditional  
7 Weighted Gene Co-expression Network Analysis (WGCNA). A total of 24 WGCNA modules  
8 with at least 20 genes were identified (Supplementary Fig. 3a and 3b). We found that 75 of the  
9 90 MEGENA modules were significantly enriched in the WGCNA modules while all the 24  
10 WGCNA modules were significantly enriched in the MEGENA modules at cFET  $p < 0.05$   
11 (Supplementary Fig. 3c and Supplementary Data 7). Therefore, 15 modules were unique to the  
12 MEGENA network. For examples, M576, which was significantly associated with regulation of  
13 action potential, was only identified by MEGENA. More importantly, MEGENA provides more  
14 attractive features far beyond the simple clustering analysis offered by WGCNA such as  
15 identification of the hierarchical structures of modules, sparsification of dense correlations and  
16 determination of key regulators. Such features enable generation of explicit network models and  
17 thus provide more biological insights than simple presentation of gene clusters. As shown in  
18 Supplementary Fig. 3c, many WGCNA modules were dissected into high resolution MEGENA  
19 modules with clear network topology. For example, the turquoise and blue modules in WGCNA  
20 were significantly enriched in multiple branches of MEGENA modules, which were associated  
21 with distinct biological functions (Supplementary Fig. 3c and Supplementary Data 5).

22 Additionally, the cell type specificity analysis showed that the oligodendrocyte-enriched M12  
23 branch in MEGENA (Supplementary Fig. 3e) was not identified by WGCNA (Supplementary  
24 Fig. 3d). Taken together, MEGENA provided more coherent and functionally relevant modules  
25 with high resolution topological network structures and clearly defined key regulators for  
26 downstream analyses.

27

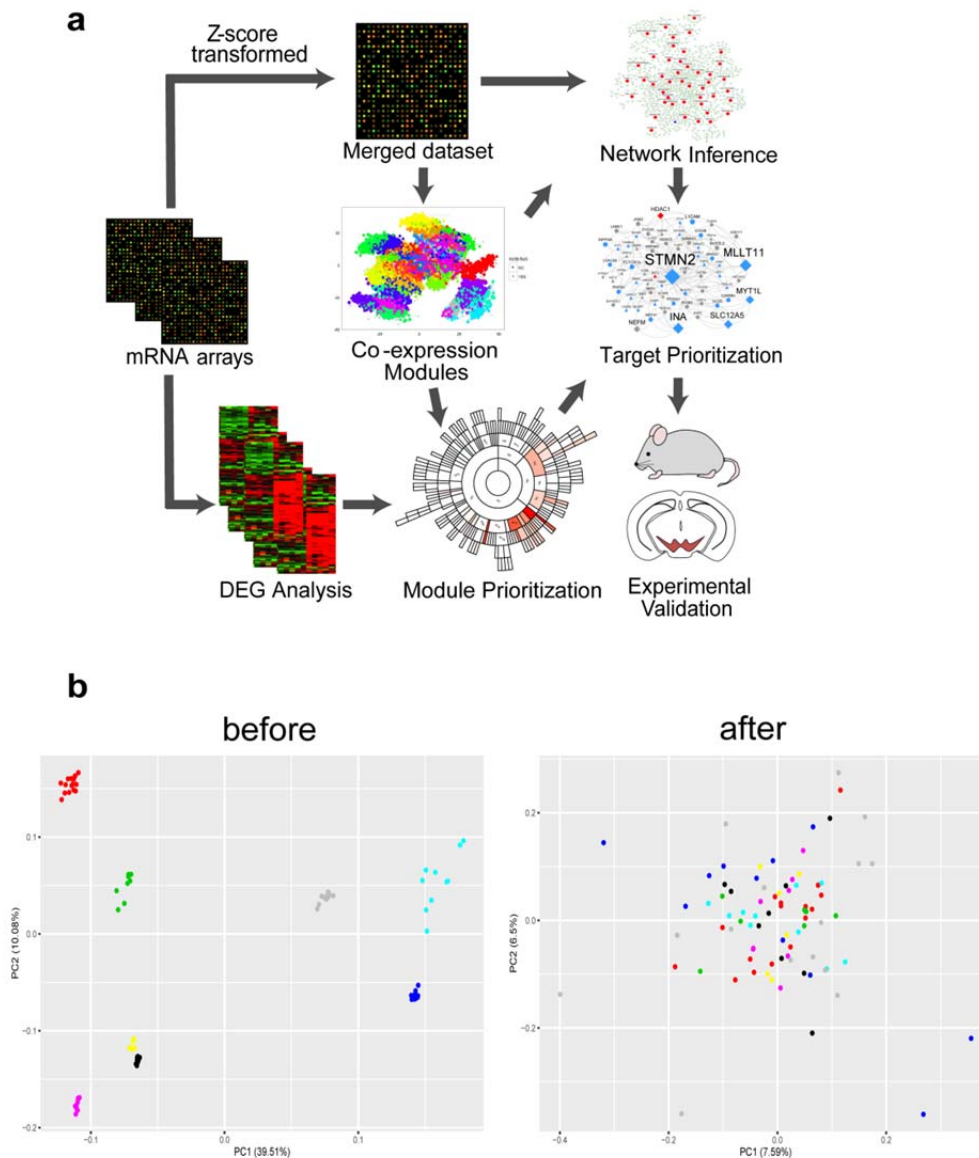

29

30 **Supplementary Figure 1. The architecture of the integrative network biology approach for**

31 **PD. (a)** Microarray based gene expression datasets from the healthy and PD postmortem human

32 brains were collected from the GEO database. From the microarray RNA expression data, we

33 first identified differentially expressed gene signatures between the controls and PD patients by

34 meta-analysis. Then each dataset went through Z-score transformation followed by correction for

35 covariates such as gender and then merged into a combined dataset including both PD cases and  
36 controls. The combined data from the PD cases were used for the co-expression network  
37 construction and causal network inference. The modules identified in the co-expression network  
38 of PD were intersected with the DEG signatures of PD and other PD related gene signatures such  
39 as PD GWAS genes and the known PD pathway genes for prioritization. The cell-type specific  
40 marker signatures were also used for characterizing cell type specificity of the modules. We also  
41 constructed a Bayesian causal network for each module. Key regulators for each module were  
42 identified by both the respective MEGENA subnetwork and Bayesian network. Finally, the key  
43 regulators of the module most associated were prioritized for experimental validation. **(b)**  
44 Principle component analysis (PCA) plot before and after z-score transformation for the PD  
45 datasets. Colors indicate samples from different studies.

46

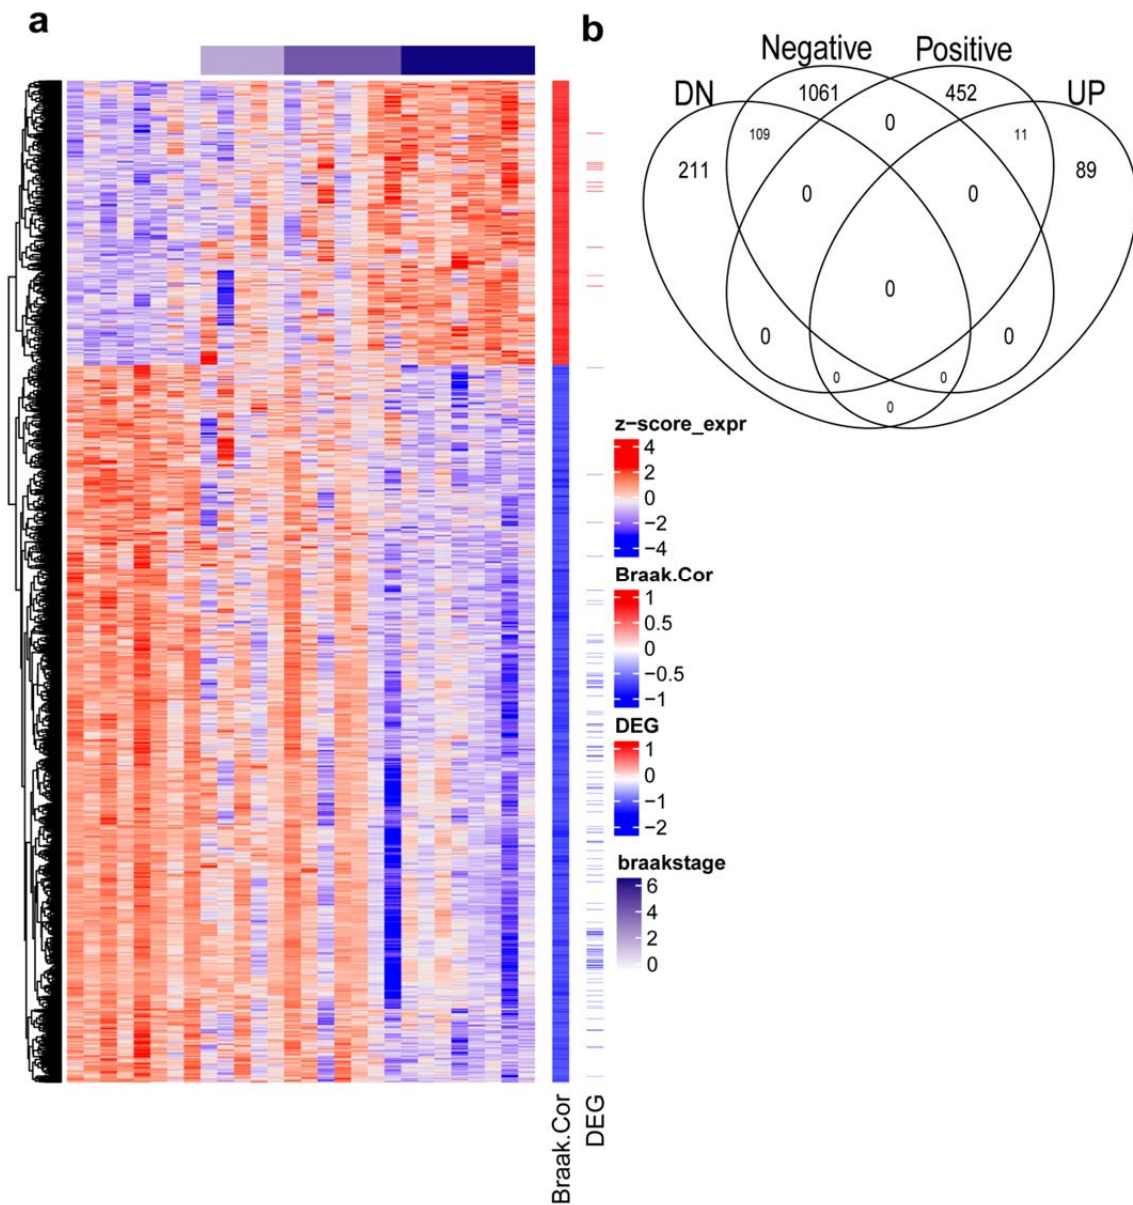

47

48 **Supplementary Figure 2. Comparison of the DEGs and the BCGs in the SN of the PD**

49 **patients. (a)** Gene expression of the BCGs in the dataset GSE49036 with Braak stage

50 represented on the top of the heatmap and the DEGs in the meta-analysis of the rest 7 datasets on

51 the side. **(b)** Venn diagram of the BCGs and the DEGs mentioned in **(a)**.

52

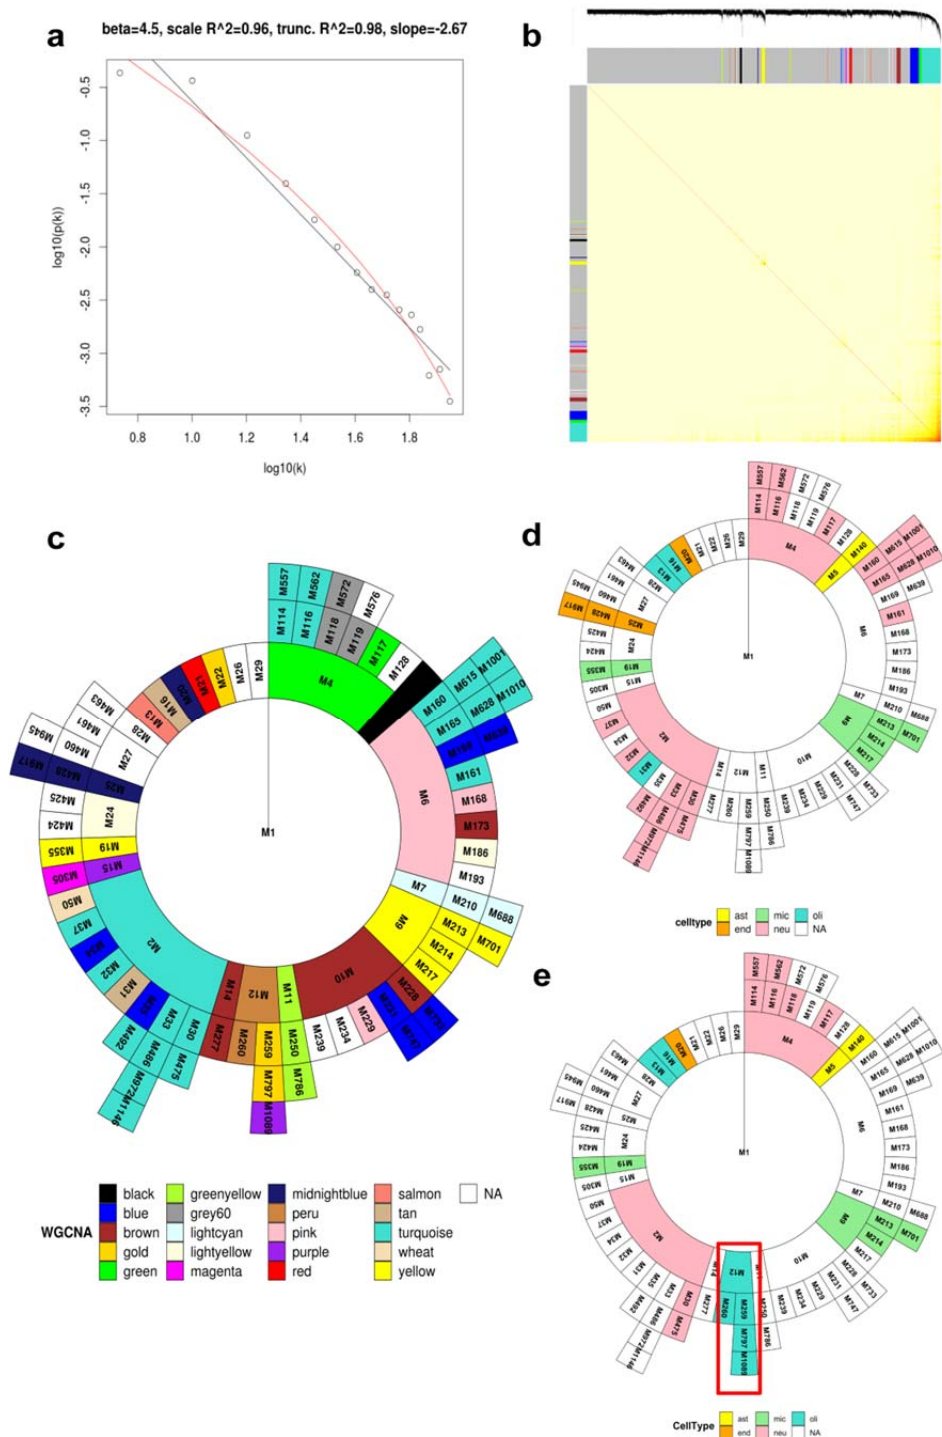

53

54 **Supplementary Figure 3. Comparison of the modules from MEGENA and those from**  
 55 **WGCNA. (a)** Parameters chosen to fit the scale free topology in WGCNA. **(b)** The heatmap of  
 56 the modules identified by WGCNA. **(c)** Conservation of the modules identified by WGCNA and

57 those by MEGENA. The sunburst plot showed the hierarchical organization of the MEGENA  
58 modules and their enrichment for the WGCNA modules which were represented by different  
59 color names. A MEGENA module (Mxx) in a color (Y) other than white indicates a significant  
60 conservation between Mxx and the WGCNA module represented by the color Y. **(d)** Projection  
61 of WGCNA module enrichment with cell type markers onto MEGENA sunburst plot. Cell type  
62 specificity of each WGCNA module was first determined by FET test with cell type markers and  
63 then matched to its overlapping MEGENA modules identified in **(c)**, e.g, the microglia-enriched  
64 yellow module in WGCNA was significantly overlapped with the M9 and M19 branches in  
65 MEGENA. Therefore, these two branches were colored in lightgreen for microglia. **(e)**  
66 MEGENA module enrichment for cell type specific marker signatures. Red box highlighted the  
67 additional information MEGENA provided compared to WGCNA.

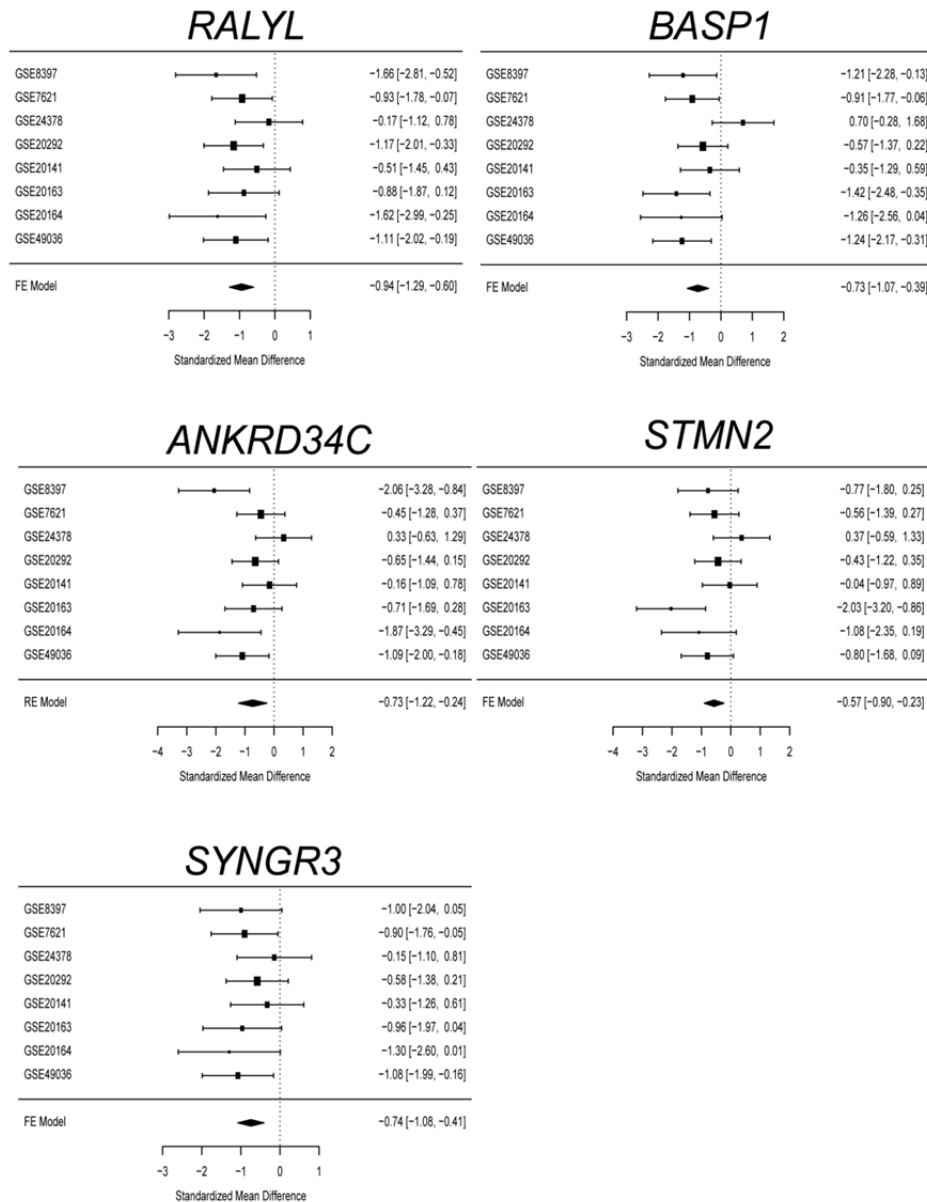

69

70 **Supplementary Figure 4. The meta-analysis of the top 5 key regulators in M4.** Standardized  
 71 mean differences of the gene expressions of the top 5 key regulators in the SN between the  
 72 postmortem PD and control brains in 8 human PD studies were shown here. A fixed effect model  
 73 was applied to *RALYL*, *BASP1*, *STMN2* and *SYNGR3* based on heterogeneity test while a random  
 74 effect model was applied to *ANKRD34C*. All data are present as Mean SMD [95% CI].



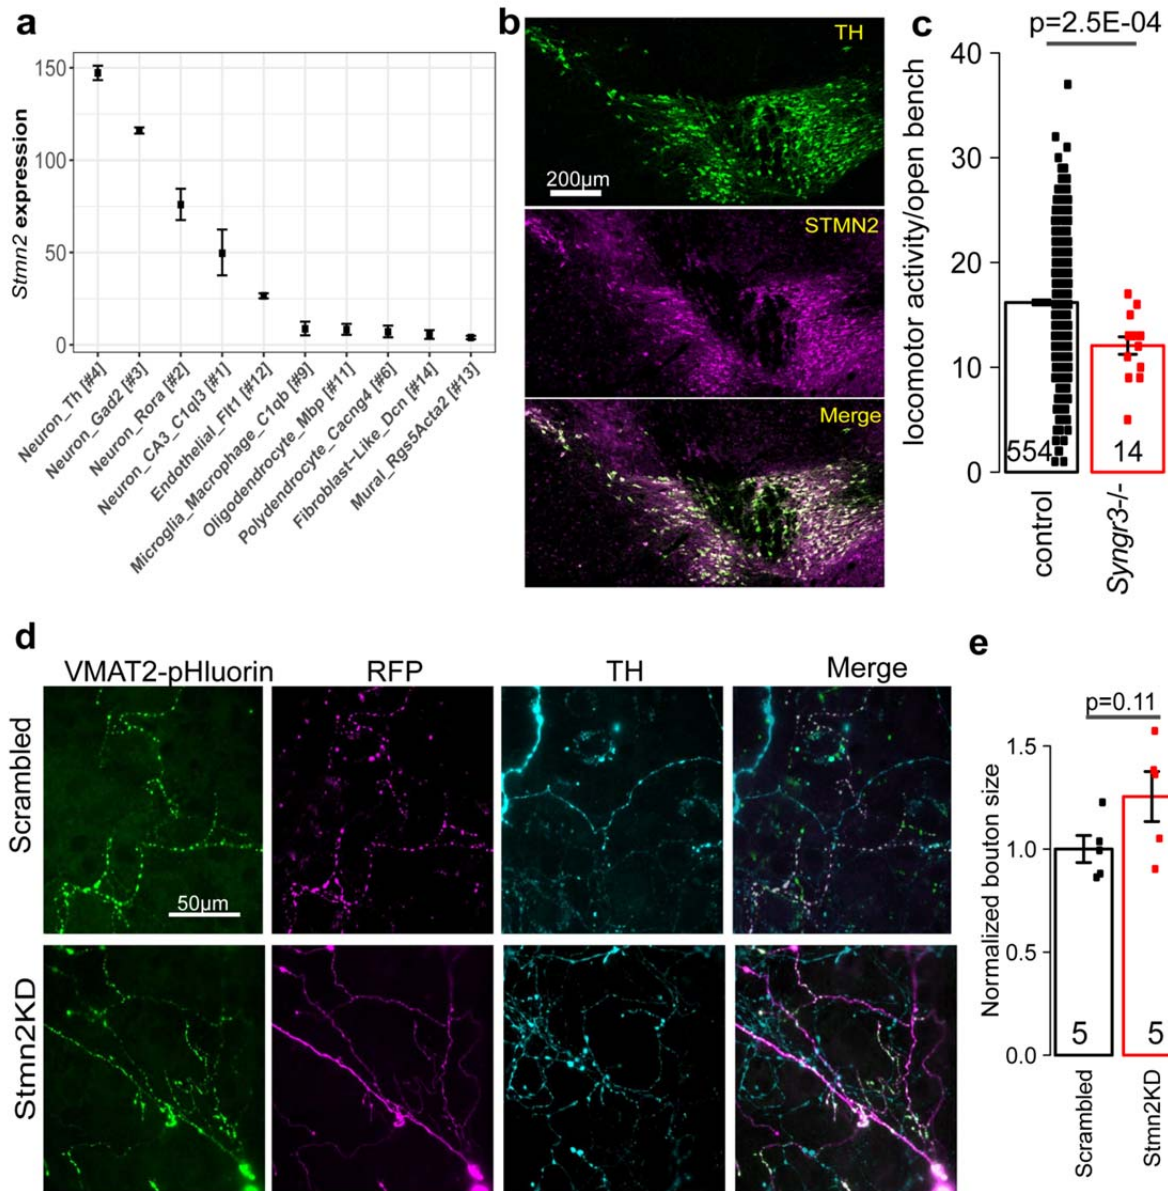

75

76 **Supplementary Figure 5. Prioritization of top candidates for experimental validation. (a)**

77 *Stmn2* expression was found enriched in TH+ neurons ([www.dropviz.org](http://www.dropviz.org)). Data are present as

78 Mean±95% CI. (b) STMN2 expression was found enriched in TH+ neurons in the brain slices in

79 3-month-old wildtype C57BL/6J mice. (c) Locomotor activity measured in open bench assay is

80 impaired in *Syngn3*<sup>-/-</sup> mice. N=554 for control, N=14 for *Syngn3*<sup>-/-</sup>; two-sided Student's *t*-test for

81 two group comparison, *t*=4.7332, *df*=15.259, *p*=2.5E-04. (d) Immunostaining of VMAT2-

82 pHluorin, RFP tag of *Stmn2*-shRNA plasmid and TH of recorded non-TH neurons treated with  
83 scrambled or *Stmn2*-shRNA. (e) Quantification of bouton sizes in scrambled and *Stmn2*-shRNA  
84 treated non-TH neurons. Two-sided Student's *t*-test for two group comparison.  $t=1.8464$ ,  $df=8$ ,  
85  $p\text{-value}=0.11$ . Data in (c) and (e) are present as  $\text{Mean}\pm\text{SEM}$ .

86

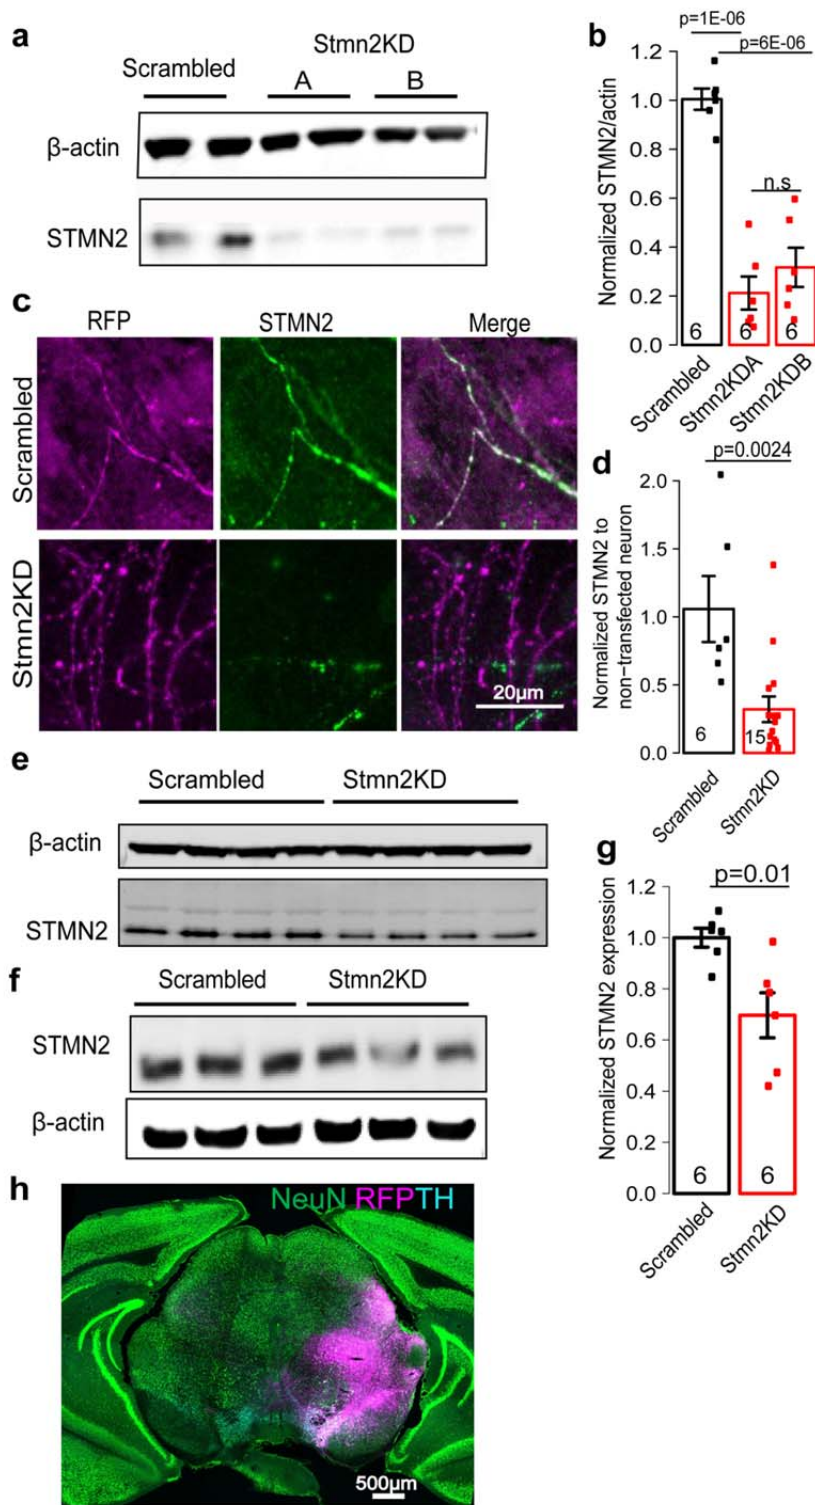

87  
88 **Supplementary Figure 6. Knockdown efficiency of *Stmn2*-shRNA construct and AAV. (a)**

89 The efficiency of two *Stmn2*-shRNA constructs was tested by western blot in N2A cells. Two

90 biological replicates in each experiment and three independent experiments were performed. **(b)**  
91 The densitometry quantification of *Stmn2* shRNA knockdown efficiency. One-way ANOVA and  
92 TukeyHSD test were used to compare the differences between groups.  $F=43.27$ ,  $df=2$ ,  $p=5.9E-$   
93  $07$ ; *Stmn2*KDA-Scrambled,  $p=1E-06$ ; *Stmn2*KDB-Scrambled,  $p=6E-06$ . **(c)** Immunostaining of  
94 STMN2 in the scrambled-treated and *Stmn2* knockdown midbrain cultures. Construct B was  
95 used in all following experiments and the knockdown efficiency was consistent with what was  
96 observed in N2A cells. **(d)** The densitometry quantification of *Stmn2* shRNA knockdown  
97 efficiency in cultured midbrain neurons. Two-sided Student's *t*-test,  $t= 3.4909$ ,  $df = 19$ ,  $p\text{-value} =$   
98  $0.0024$ . **(e)** The knockdown efficiency of *Stmn2*-shRNA AAV at 72 hours post-infection in N2A  
99 cells. **(f)** Western blot of the midbrain tissues isolated from mice received either scrambled AAV  
100 or *Stmn2* knockdown AAV. **(g)** Densitometry quantification of STMN2/actin in the control and  
101 *Stmn2* knockdown group.  $N=6$  in each group, two-sided Student's *t*-test.  $t=3.1763$ ,  $df = 10$ ,  $p\text{-}$   
102  $value = 0.009881$ . **(h)** Viral spreading after AAV injection in SN. All data are present as  
103 Mean $\pm$ SEM.

104

105

106 **Supplementary Tables**107 **Supplementary Table 1. Human postmortem brain studies of PD in public domain**

| <b>GEO ID</b> | <b>Brain Region</b>      | <b>Control</b> | <b>PD</b> | <b>Platform</b>                             | <b>Pre-Processed</b> | <b>Note</b>                                               |
|---------------|--------------------------|----------------|-----------|---------------------------------------------|----------------------|-----------------------------------------------------------|
| GSE8397       | lateral substantia nigra | 7              | 9         | Affymetrix Human Genome U133A Array         | RMA                  |                                                           |
| GSE7621       | substantia nigra         | 9              | 16        | Affymetrix Human Genome U133 Plus 2.0 Array | MAS5                 |                                                           |
| GSE24378      | substantia nigra         | 9              | 8         | Affymetrix Human X3P Array                  | MAS5                 |                                                           |
| GSE20292      | substantia nigra         | 15             | 11        | Affymetrix Human Genome U133A Array         | MAS5                 | 3 control samples were removed as outliers                |
| GSE20141      | substantia nigra         | 8              | 10        | Affymetrix Human Genome U133 Plus 2.0 Array | MAS5                 |                                                           |
| GSE20163      | substantia nigra         | 9              | 8         | Affymetrix Human Genome U133A Array         | MAS5                 |                                                           |
| GSE20164      | substantia nigra         | 5              | 6         | Affymetrix Human Genome U133A Array         | MAS5                 |                                                           |
| GSE49036      | substantia nigra         | 8              | 15        | Affymetrix Human Genome U133 Plus 2.0 Array | GC-RMA               | 5 iLBD samples were excluded for DEG and network analysis |
|               | total                    | 70             | 83        |                                             |                      |                                                           |

108

109

110 Supplementary Table 2. Module ranking

| module | Score.rank  | CellType | CellType.adj.p | ALL      | DN       | UP       | GWAS.Catalog | hsa05012 |
|--------|-------------|----------|----------------|----------|----------|----------|--------------|----------|
| M4     | 25.1023531  | neu      | 6.17E-28       | 7.90E-26 | 2.69E-29 | 1        | 1            | 1        |
| M116   | 22.66096449 | neu      | 3.00E-18       | 2.18E-23 | 7.35E-23 | 1        | 1            | 1        |
| M2     | 18.66254901 | neu      | 2.93E-06       | 1.97E-15 | 1.16E-24 | 1        | 1            | 0.00011  |
| M30    | 18.58976303 | neu      | 1.15E-22       | 2.57E-19 | 1.08E-22 | 1        | 1            | 1        |
| M562   | 16.14588077 | neu      | 3.79E-11       | 7.15E-17 | 2.72E-15 | 0.036445 | 1            | 1        |
| M1001  | 13.94404107 | NA       | 1              | 1.14E-14 | 2.10E-15 | 1        | 1            | 1        |
| M475   | 13.57204579 | neu      | 7.86E-18       | 2.68E-14 | 3.52E-17 | 1        | 1            | 1        |
| M114   | 12.43914742 | neu      | 2.44E-11       | 3.64E-13 | 1.25E-12 | 1        | 1            | 1        |
| M557   | 12.43790895 | neu      | 4.32E-10       | 3.65E-13 | 1.45E-13 | 1        | 1            | 1        |
| M160   | 12.36364902 | NA       | 1              | 4.33E-13 | 6.38E-15 | 1        | 1            | 1        |
| M615   | 11.26171502 | NA       | 1              | 5.47E-12 | 2.70E-13 | 1        | 1            | 1        |
| M117   | 11.17682777 | neu      | 0.026989276    | 6.66E-12 | 9.88E-15 | 1        | 1            | 1        |
| M32    | 10.82206669 | NA       | 1              | 3.26E-08 | 6.77E-10 | 1        | 1            | 0.000462 |
| M628   | 8.540822829 | NA       | 1              | 1.02E-05 | 1.95E-07 | 1        | 1            | 0.000281 |
| M165   | 5.955588198 | NA       | 1              | 6.48E-05 | 4.48E-07 | 1        | 1            | 0.017099 |
| M1010  | 5.052757604 | NA       | 1              | 0.000518 | 8.61E-05 | 1        | 1            | 0.017099 |
| M37    | 3.632234436 | NA       | 1              | 0.000233 | 3.39E-06 | 1        | 1            | 1        |
| M1146  | 3.285726316 | NA       | 1              | 0.000518 | 1.67E-05 | 1        | 1            | 1        |
| M733   | 2.650169463 | NA       | 1              | 0.002238 | 0.001671 | 1        | 1            | 1        |
| M486   | 2.573232849 | NA       | 1              | 0.002672 | 0.000255 | 1        | 1            | 1        |
| M688   | 2.246880706 | NA       | 1              | 0.005664 | 0.000945 | 1        | 1            | 1        |
| M972   | 2.246880706 | NA       | 1              | 0.005664 | 0.00026  | 1        | 1            | 1        |
| M31    | 2.167128306 | NA       | 1              | 0.006806 | 0.008668 | 1        | 1            | 1        |
| M492   | 2.093689411 | NA       | 1              | 0.00806  | 0.000528 | 1        | 1            | 1        |
| M33    | 2.085631265 | NA       | 1              | 0.00821  | 0.000305 | 1        | 1            | 1        |
| M35    | 2.071964352 | NA       | 1              | 0.008473 | 0.001242 | 1        | 1            | 1        |
| M161   | 1.765810921 | NA       | 1              | 1        | 1        | 1        | 1            | 0.017147 |
| M34    | 1.765810921 | NA       | 1              | 1        | 1        | 1        | 1            | 0.017147 |
| M16    | 1.353818955 | oli      | 4.12E-19       | 0.044277 | 1        | 2.98E-10 | 1            | 1        |
| M9     | 0           | mic      | 2.31E-69       | 1        | 1        | 1        | 1            | 1        |
| M213   | 0           | mic      | 3.59E-41       | 1        | 1        | 1        | 1            | 1        |
| M5     | 0           | ast      | 4.27E-37       | 1        | 1        | 1        | 1            | 1        |
| M701   | 0           | mic      | 1.11E-31       | 1        | 1        | 1        | 1            | 1        |
| M20    | 0           | end      | 1.31E-28       | 1        | 1        | 1        | 1            | 1        |
| M140   | 0           | ast      | 2.05E-24       | 1        | 1        | 1        | 1            | 1        |
| M13    | 0           | oli      | 5.10E-22       | 1        | 1        | 0.000518 | 1            | 1        |
| M214   | 0           | mic      | 7.79E-15       | 1        | 1        | 1        | 1            | 1        |
| M19    | 0           | mic      | 9.62E-13       | 1        | 1        | 1        | 1            | 1        |
| M355   | 0           | mic      | 3.16E-09       | 1        | 1        | 1        | 1            | 1        |
| M12    | 0           | oli      | 2.05E-07       | 1        | 1        | 1        | 1            | 1        |
| M259   | 0           | oli      | 1.07E-06       | 1        | 1        | 1        | 1            | 1        |
| M797   | 0           | oli      | 1.25E-06       | 1        | 1        | 1        | 1            | 1        |
| M1089  | 0           | oli      | 1.60E-06       | 1        | 1        | 1        | 1            | 1        |
| M260   | 0           | oli      | 0.00951514     | 1        | 1        | 1        | 1            | 1        |
| M118   | 0           | neu      | 0.019373572    | 1        | 1        | 1        | 1            | 1        |
| M10    | 0           | NA       | 1              | 1        | 1        | 1        | 1            | 1        |
| M11    | 0           | NA       | 1              | 1        | 1        | 0.006507 | 1            | 1        |
| M119   | 0           | NA       | 1              | 1        | 1        | 1        | 1            | 1        |

|      |   |    |   |   |          |          |   |   |
|------|---|----|---|---|----------|----------|---|---|
| M128 | 0 | NA | 1 | 1 | 1        | 1        | 1 | 1 |
| M14  | 0 | NA | 1 | 1 | 1        | 1        | 1 | 1 |
| M15  | 0 | NA | 1 | 1 | 1        | 1        | 1 | 1 |
| M168 | 0 | NA | 1 | 1 | 1        | 1        | 1 | 1 |
| M169 | 0 | NA | 1 | 1 | 1        | 1        | 1 | 1 |
| M173 | 0 | NA | 1 | 1 | 1        | 1        | 1 | 1 |
| M186 | 0 | NA | 1 | 1 | 1        | 1        | 1 | 1 |
| M193 | 0 | NA | 1 | 1 | 1        | 1        | 1 | 1 |
| M21  | 0 | NA | 1 | 1 | 1        | 1        | 1 | 1 |
| M210 | 0 | NA | 1 | 1 | 0.019243 | 1        | 1 | 1 |
| M217 | 0 | NA | 1 | 1 | 1        | 1        | 1 | 1 |
| M22  | 0 | NA | 1 | 1 | 1        | 1        | 1 | 1 |
| M228 | 0 | NA | 1 | 1 | 0.017528 | 1        | 1 | 1 |
| M229 | 0 | NA | 1 | 1 | 1        | 1        | 1 | 1 |
| M231 | 0 | NA | 1 | 1 | 1        | 1        | 1 | 1 |
| M234 | 0 | NA | 1 | 1 | 1        | 1        | 1 | 1 |
| M239 | 0 | NA | 1 | 1 | 1        | 1        | 1 | 1 |
| M24  | 0 | NA | 1 | 1 | 1        | 1        | 1 | 1 |
| M25  | 0 | NA | 1 | 1 | 1        | 1        | 1 | 1 |
| M250 | 0 | NA | 1 | 1 | 1        | 0.002644 | 1 | 1 |
| M26  | 0 | NA | 1 | 1 | 1        | 1        | 1 | 1 |
| M27  | 0 | NA | 1 | 1 | 1        | 1        | 1 | 1 |
| M277 | 0 | NA | 1 | 1 | 1        | 1        | 1 | 1 |
| M28  | 0 | NA | 1 | 1 | 1        | 1        | 1 | 1 |
| M29  | 0 | NA | 1 | 1 | 1        | 1        | 1 | 1 |
| M305 | 0 | NA | 1 | 1 | 1        | 1        | 1 | 1 |
| M424 | 0 | NA | 1 | 1 | 1        | 1        | 1 | 1 |
| M425 | 0 | NA | 1 | 1 | 1        | 1        | 1 | 1 |
| M428 | 0 | NA | 1 | 1 | 1        | 1        | 1 | 1 |
| M460 | 0 | NA | 1 | 1 | 1        | 1        | 1 | 1 |
| M461 | 0 | NA | 1 | 1 | 1        | 1        | 1 | 1 |
| M463 | 0 | NA | 1 | 1 | 1        | 1        | 1 | 1 |
| M50  | 0 | NA | 1 | 1 | 1        | 1        | 1 | 1 |
| M572 | 0 | NA | 1 | 1 | 1        | 1        | 1 | 1 |
| M576 | 0 | NA | 1 | 1 | 1        | 1        | 1 | 1 |
| M6   | 0 | NA | 1 | 1 | 0.001303 | 1        | 1 | 1 |
| M639 | 0 | NA | 1 | 1 | 1        | 1        | 1 | 1 |
| M7   | 0 | NA | 1 | 1 | 1        | 1        | 1 | 1 |
| M747 | 0 | NA | 1 | 1 | 1        | 1        | 1 | 1 |
| M786 | 0 | NA | 1 | 1 | 1        | 4.24E-05 | 1 | 1 |
| M917 | 0 | NA | 1 | 1 | 1        | 1        | 1 | 1 |
| M945 | 0 | NA | 1 | 1 | 1        | 1        | 1 | 1 |

111

112

## 113 Supplementary Table 3. M4 hub ranking

| <b>id</b> | <b>MEGENA</b> | <b>BN</b> | <b>comb.rank.score</b> | <b>DEG</b> |
|-----------|---------------|-----------|------------------------|------------|
| RALYL     | 3             | 1         | 0.002403               | DN         |
| BASP1     | 2             | 5         | 0.00226                | DN         |
| ANKRD34C  | 4             | 3         | 0.002222               | DN         |
| STMN2     | 5             | 6         | 0.001998               | DN         |
| SYNGR3    | 1             | 11        | 0.001989               | DN         |
| FGF13     | 8             | 7         | 0.001746               | DN         |
| DDC       | 11            | 2         | 0.001743               | DN         |
| NELL2     | 6             | 16        | 0.001447               | DN         |
| NUDT11    | 7             | 18        | 0.001302               | DN         |
| SLC6A3    | 17            | 9         | 0.001083               | DN         |
| SYN1      | 14            | 24        | 0.000758               | NA         |
| FBXW4     | 12            | 27        | 0.00072                | UP         |
| RUSC1     | 19            | 19        | 0.000698               | NA         |
| CNTNAP1   | 18            | 30        | 0.000441               | NA         |
| MAST2     | 20            | 31        | 0.000362               | NA         |
| PIP5K1C   | 29            | 45        | 8.61E-06               | NA         |



115 Supplementary Table 4. Cell type specific expression of top regulators in adult mouse brain ([www.dropviz.org](http://www.dropviz.org))

| Region           | Class                | Cluster                        | Raly1<br>Expr | Raly1<br>P-Val | Basp1<br>Expr | Basp1<br>P-Val | Ankrd34c<br>Expr | Ankrd34c<br>P-Val | Stmn2<br>Expr | Stmn2<br>P-Val | Syngn3<br>Expr | Syngn3<br>P-Val |
|------------------|----------------------|--------------------------------|---------------|----------------|---------------|----------------|------------------|-------------------|---------------|----------------|----------------|-----------------|
| Substantia Nigra | Neuron               | Neuron_CA3_C1qI3 [#1]          | 2.56          | 1.2E-08        | 4.95          | 4.6E-111       | 0                | 1                 | 3.61          | 0.15           | 2.64           | 0.11            |
| Substantia Nigra | Neuron               | Neuron_Gad2 [#3]               | 2.48          | 0              | 4.62          | 0              | 0.69             | 1.9E-85           | 4.56          | 0              | 2.89           | 0               |
| Substantia Nigra | Neuron               | Neuron_Th [#4]                 | 2.20          | 6.3E-41        | 4.62          | 0              | 0.69             | 0.007             | 4.80          | 0              | 3.47           | 0               |
| Substantia Nigra | Neuron               | Neuron_Rora [#2]               | 1.39          | 0.37           | 4.45          | 1.1E-83        | 1.79             | 2.0E-19           | 4.16          | 7.1E-29        | 2.48           | 7.1E-07         |
| Substantia Nigra | Polydendrocyte       | Polydendrocyte_Cacng4 [#6]     | 1.39          | 0.43           | 4.50          | 1.2E-48        | 0                | 0.64              | 2.08          | 7.3E-18        | 1.79           | 0.35            |
| Substantia Nigra | Microglia_Macrophage | Microglia_Macrophage_C1qb [#9] | 0.69          | 0.04           | 3.93          | 0.001          | 0                | 0.63              | 2.08          | 2.9E-14        | 0.69           | 0.001           |
| Substantia Nigra | Oligodendrocyte      | Oligodendrocyte_Tfr [#10]      | 0             | 0              | 1.61          | 0              | 0                | 2.6E-73           | 1.61          | 0              | 0.69           | 0               |
| Substantia Nigra | Oligodendrocyte      | Oligodendrocyte_Mbp [#11]      | 0             | 1.1E-05        | 2.20          | 4.3E-20        | 0                | 0.43              | 2.08          | 1.5E-23        | 0.69           | 2.6E-06         |
| Substantia Nigra | Endothelial          | Endothelial_Flt1 [#12]         | 0             | 6.0E-75        | 1.39          | 0              | 0                | 1.9E-11           | 3.00          | 4.2E-65        | 0              | 6.0E-141        |
| Substantia Nigra | Mural                | Mural_Rgs5Acta2 [#13]          | 0             | 1.2E-22        | 1.39          | 2.0E-127       | 0                | 0.006             | 1.61          | 3.0E-136       | 0              | 1.1E-43         |
| Substantia Nigra | Fibroblast-Like      | Fibroblast-Like_Dcn [#14]      | 0             | 4.9E-07        | 1.95          | 2.6E-26        | 0                | 1                 | 1.79          | 1.5E-28        | 1.10           | 4.3E-06         |
| Substantia Nigra | Polydendrocyte       | Polydendrocyte_Tnr [#5]        | 0             | 4.0E-18        | 2.64          | 5.1E-68        | 0                | 0.004             | 1.39          | 1.8E-112       | 0.69           | 1.5E-29         |
| Substantia Nigra | Astrocyte            | Astrocyte_Gja1 [#7]            | 0             | 5.4E-38        | 2.89          | 2.9E-60        | 0                | 0.002             | 1.39          | 1.6E-231       | 0.69           | 5.3E-66         |
| Substantia Nigra | Ependyma             | Ependyma [#8]                  | 0             | 0.73           | 2.20          | 0.001          | 0                | 1                 | 1.10          | 4.7E-06        | 0              | 0.041           |
